# Supplementary material for: Multimodality cellular and molecular imaging of concomitant tumour enhancement in a syngeneic mouse model of breast cancer metastasis
Source: PubMed Central journal article supplement (PMC5997674; doi:10.1038/s41598-018-27208-4), 2018-06-12
Supplement: 41598_2018_27208_MOESM1_ESM.pdf [file 41598_2018_27208_MOESM1_ESM.pdf]

***Multimodality cellular and molecular imaging of concomitant tumour enhancement in a syngeneic mouse model of breast cancer metastasis***

Katie M. Parkins<sup>1,2</sup>, Veronica P. Dubois<sup>1,2</sup>, Amanda M. Hamilton<sup>1</sup>, Ashley V. Makela<sup>1,2</sup>,  
John A. Ronald<sup>1,2,3</sup>, Paula J. Foster\*<sup>1,2</sup>

<sup>1</sup>Robarts Research Institute, The University of Western Ontario, London, Ontario, Canada

<sup>2</sup>The Department of Medical Biophysics, The University of Western Ontario, London, Ontario, Canada

<sup>3</sup>Lawson Health Research Institute, London, Ontario, Canada

**Corresponding Author:** [pfoster@robarts.ca](mailto:pfoster@robarts.ca)

Imaging Research Laboratories, Robarts Research Institute  
1151 Richmond Street North London, Ontario, Canada N6A 5B7  
Phone:(519) 931-5777 Ext. 24316

***Supplementary Information File***

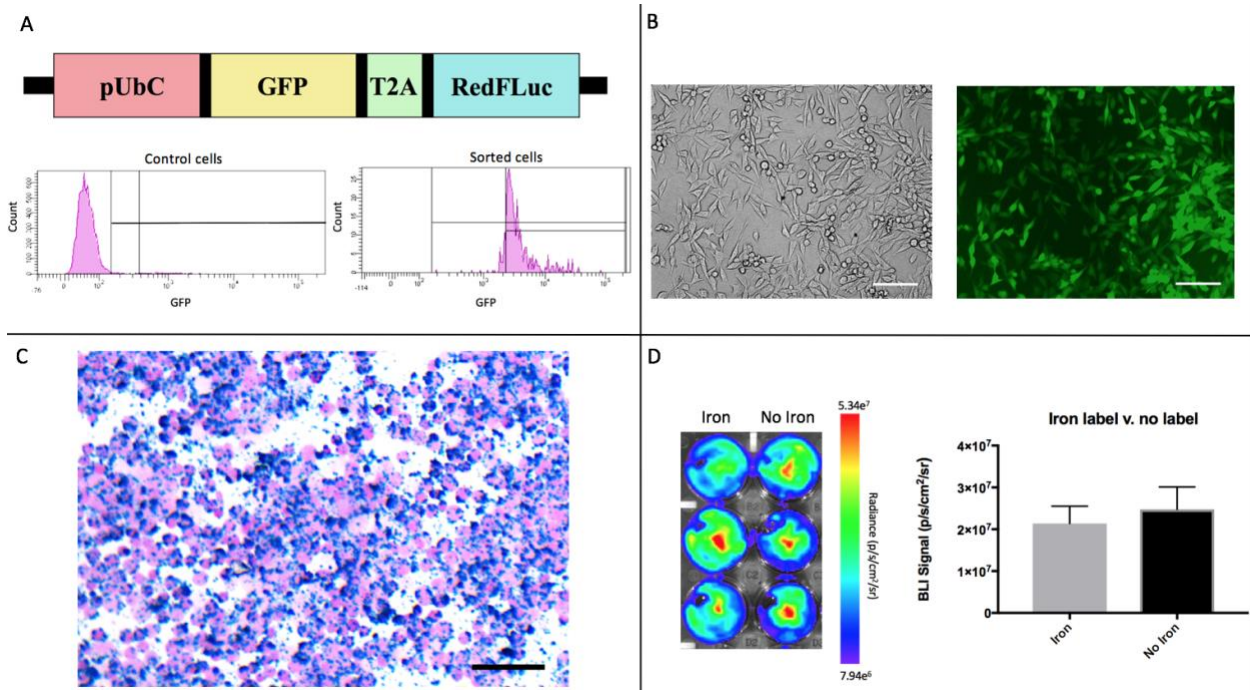

**Suppl. Figure 1: A/B)** 4T1-BR5 cells were transduced and sorted to stably co-express Red-FLuc/GFP using a commercial lentiviral vector (Scale bars = 100 microns). **C)** The resultant 4T1BR5-Red-FLuc/GFP cells were efficiently labeled with > 90% of cells labeled with MPIO prior to intracardiac injection (Scale bar = 200 microns). **D)** No significant difference in BLI signal was detected in 4T1BR5-Red-FLuc/GFP cells that were labeled with MPIO and cells that were not labeled. Data is presented as mean +/- SD.

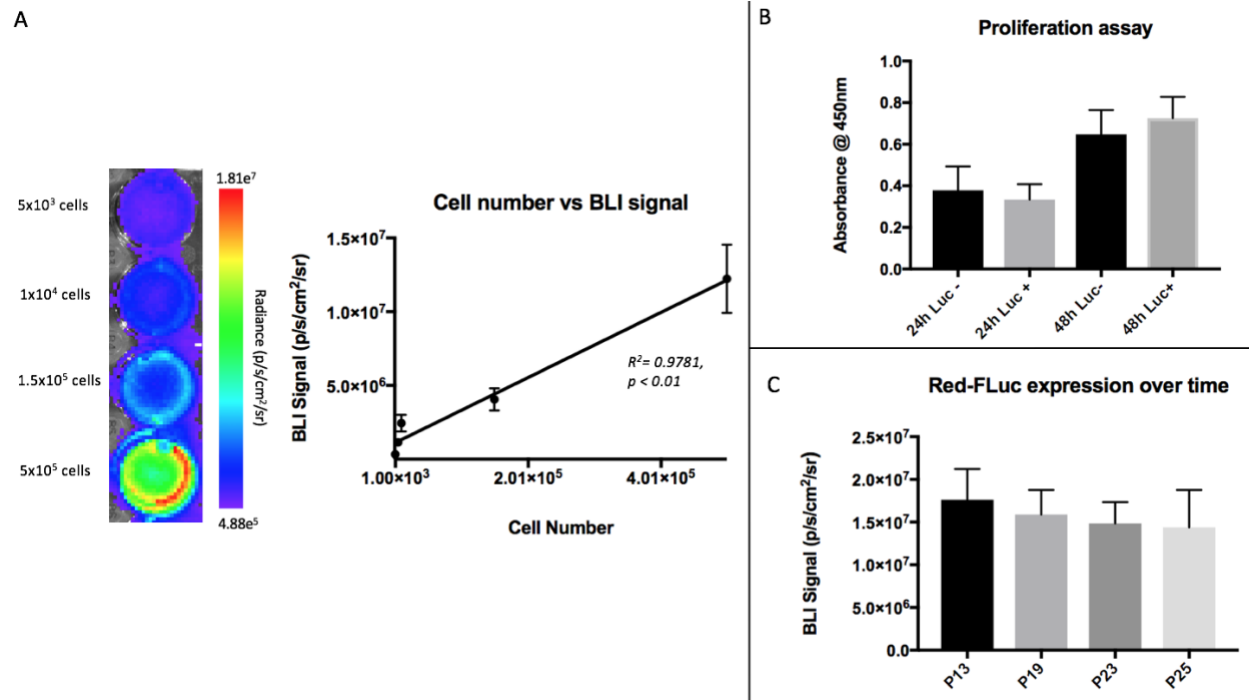

**Suppl. Figure 2:** A significant positive correlation was found between the number of 4T1BR5-Red-FLuc/GFP cells and BLI signal (A). There was not a significant difference in cellular proliferation detected between naïve 4T1-BR5 and 4T1BR5-Red-FLuc/GFP cells (B). 4T1-BR5-Red-FLuc/GFP cells showed no significant change in Red-FLuc expression over multiple passages in vitro (C).

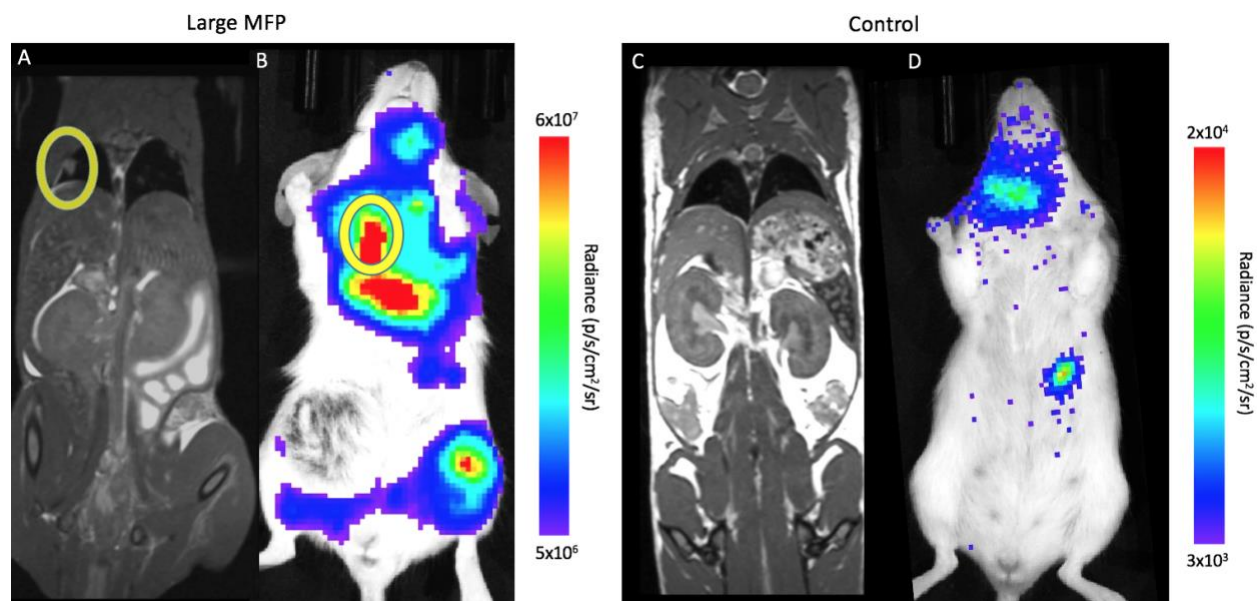

**Suppl. Figure 3: A)** Lung metastases (circled in yellow) were detectable at day 14 with whole body MRI in mice with a large MFP primary tumor, but **C)** not control mice. **B)** BLI signal was also detected in the lung region of large MFP mice on day 14, but **D)** not control mice.

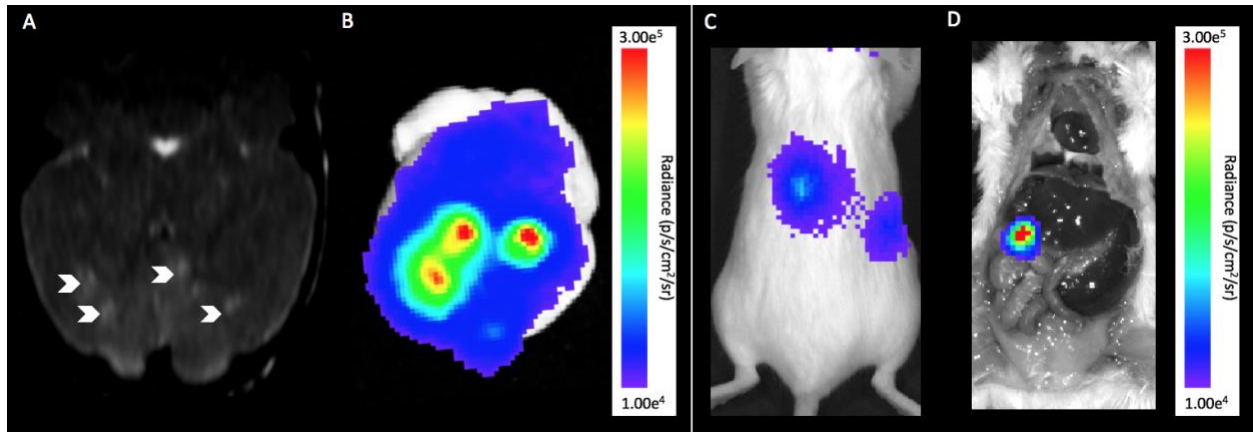

**Suppl. Figure 4:** A representative in vivo MR image of the brain (A) and corresponding ex vivo BLI (B); *in vivo* (C) and *ex vivo* (D) whole body BLI were also matched presenting signal in the abdominal region.

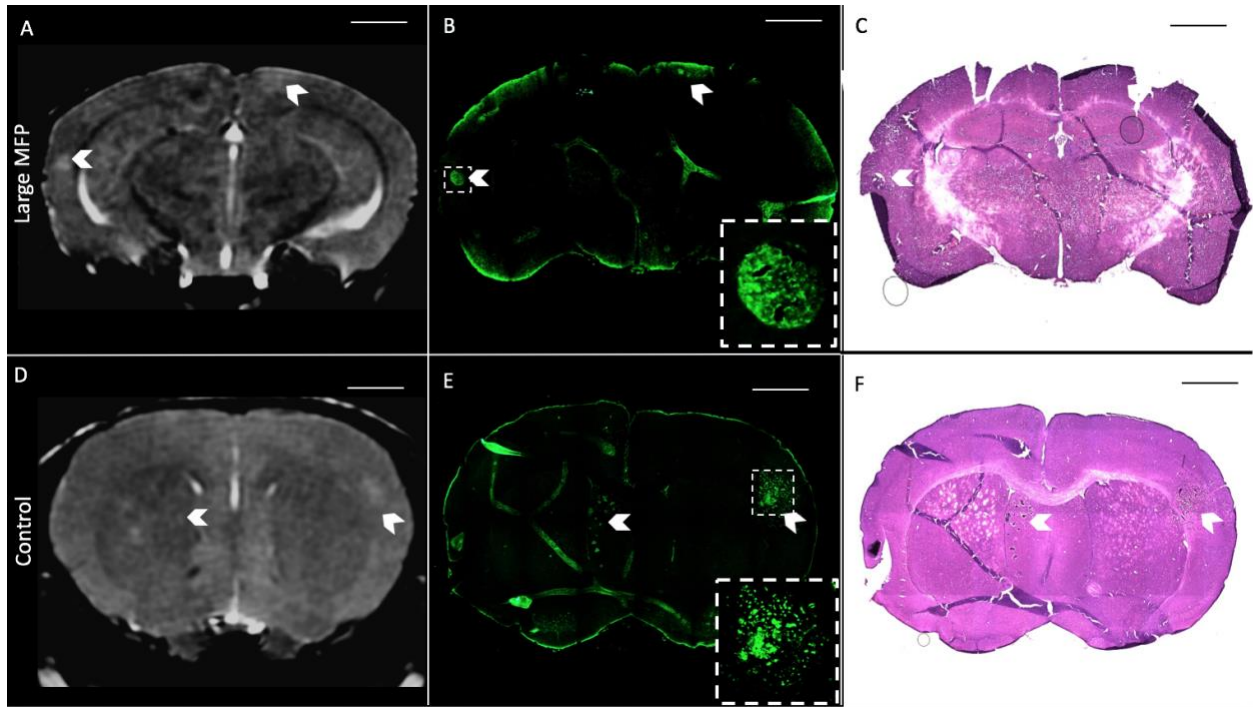

**Suppl. Figure 5:** A representative MR slice (**A/D**) corresponded well with GFP positive cells (**B/E**) and H&E staining (**C/F**) confirming that MR-detectable metastases contain 4T1BR5-Red-FLuc/GFP cells. Scale bars = 500 microns.
